# Supplementary material
Source: Springer Nature journal article supplement (https://www.springermedizin.de/resource/supplementary/12936_2013_2881_MOESM3_ESM.pdf/9544502)
Supplement: MOESM3 [file 9544502]

**Additional File 3: Determinants of ITN ownership and use in pregnancy (arranged by country)**

| Author                          | Year | Country  | n=                   | Where | Study Summary                                                                                                                                              | Factors significantly associated with ITN ownership/ use (OR/CIs if provided)                                                                                                                                                         | Analysis |
|---------------------------------|------|----------|----------------------|-------|------------------------------------------------------------------------------------------------------------------------------------------------------------|---------------------------------------------------------------------------------------------------------------------------------------------------------------------------------------------------------------------------------------|----------|
| Pettifor <i>et al</i> [37]      | 2008 | DRC      | 351p                 | ANC   | Baseline data from a wider longitudinal study. Bed net ownership, use and perceptions among women seeking ANC.                                             | <b>Ownership:</b> $\geq$ Secondary education vs. less education OR 3.4 (1.6-7.3),<br><b>Use:</b> Education OR 2.8 (1.3-6.0)                                                                                                           | MV       |
| Deressa <i>et al</i> [17]       | 2011 | Ethiopia | 2874H<br>H           | HH    | 2009 HH survey in 2 districts, 2 years after a free distribution campaign.                                                                                 | <b>Use:</b> $>$ 1 ITN in the household OR 2.9 (2.2-3.9), ITN knowledge OR 1.5 (1-2.3), lack of problems in using ITNs OR 1.9 (1-3.6)                                                                                                  | MV       |
| Deribew <i>et al</i> [22]       | 2010 | Ethiopia | 4135<br>HH<br>242p   | HH    | HH survey. Baseline results of a cluster randomized trial assessing LLINs distribution program.                                                            | <b>Use:</b> Malaria knowledge OR 2.0 (1.4-2.8)                                                                                                                                                                                        | MV       |
| Karunamoorthi <i>et al</i> [39] | 2010 | Ethiopia | 225p                 | ANC   | Survey of women attending ANC.                                                                                                                             | <b>Use:</b> Women's primary education vs. illiteracy (p<0.001)                                                                                                                                                                        | Chi      |
| Belay <i>et al</i> [41]         | 2008 | Ethiopia | 815p                 | HH    | HH survey.                                                                                                                                                 | <b>Use:</b> Education (literate or not) OR 3.1 (2.1-4.6)                                                                                                                                                                              | MV       |
| Odouro <i>et al</i> [42]        | 2010 | Ghana    | 2232p                | ANC   | Baseline data presented here from prospective cohort study.                                                                                                | <b>Use:</b> Older age, more years of education, higher ANC clinic attendance, better IPT coverage, history of miscarriage or the death of a child                                                                                     | UV       |
| O'Meara <i>et al</i> [44]       | 2011 | Kenya    | 44753<br>HH<br>2988p | HH    | Data from census to examine the extent of, and factors correlated with, ownership of bed nets.                                                             | <b>Ownership:</b> Urban HH animal ownership OR 1.5 (1.2-1.8) Urban nearest facility hospital OR 2.9 (1.3-6.6), Rural nearest facility health centre OR 1.2 (1.1-1.4)                                                                  | MV       |
| Hightower <i>et al</i> [45]     | 2010 | Kenya    | 182p                 | HH    | HH surveys relating to use of ITN and ownership in children under 5 and women of reproductive age. Conducted one month after a free distribution campaign. | <b>Ownership:</b> Urban residence OR 1.4 (1.1-1.8)<br><b>Use:</b> Wealth (OR not provided)                                                                                                                                            | UV       |
| Gikandi <i>et al</i> [47]       | 2008 | Kenya    | 976                  | HH    | Examining barriers to ITN/ IPT.                                                                                                                            | <b>Use:</b> IPT use OR 1.4 (1-1.8), wealth OR 2.5 (1.4-4.7), multi-gravid OR 1.5 (1-2.4)                                                                                                                                              | MV       |
| Ouma <i>et al</i> [48]          | 2007 | Kenya    | 685                  | ANC   | Malaria and anaemia among pregnant women at first ANC visit.                                                                                               | <b>Use:</b> Marital status single RR 0.7 (0.5-1), Education $<$ 8 yrs RR 0.7 (0.5-0.9), Electricity in HH RR 1.5 (1.2-2), Full time employment RR 1.3 (1-1.6), Listening to radio 1/ wk RR 1.2 (1-1.5)                                | MV       |
| Aluko <i>et al</i> [54]         | 2012 | Nigeria  | 335                  | Hosp. | Utilisation of ITN in pregnancy amongst post partum women.                                                                                                 | <b>Ownership:</b> Years of education, monogamous families, employment, residence in low population density area, religion (Christian)<br><b>Use:</b> Monogamous families, Education, Woman dependent (not employed)                   | MV       |
| Ankomah <i>et al</i> [19]       | 2012 | Nigeria  | 2348                 | HH    | Determinants of ITN ownership and utilization.                                                                                                             | <b>Ownership:</b> ITN Knowledge OR 3.9 (3-4.8), ANC Registration OR 1.3 (1.1-1.6), Urban residence OR 0.8 (0.7-1)<br><b>Use:</b> Urban residence OR 1.9 (1.3-2.7), ITN Knowledge OR 2.9 (1.9-4.6), No misconceptions OR 1.6 (1.1-2.3) | MV       |
| Auta <i>et al</i> [21]          | 2012 | Nigeria  | 34070<br>HH          | HH    | Demographic factors associated with the use of ITNs among women and pregnant children.                                                                     | <b>Use:</b> Without formal education OR 2.7 (1.1-6.6), Lowest wealth quintile OR 2.3 (1.1-5)                                                                                                                                          | UV       |
| Akinleye <i>et al</i> [55]      | 2011 | Nigeria  | 209p                 | Hosp. | Determining the level of knowledge of malaria and related preventive measures.                                                                             | <b>Use:</b> ITN knowledge OR 0.9 (1-5.8)                                                                                                                                                                                              | BV       |

| Author                        | Year | Country      | n=                 | Where | Study Summary                                                                                                                                                              | Factors significantly associated with ITN ownership/ use (OR/CIs if provided)                                                                                                                                                     | Analysis |
|-------------------------------|------|--------------|--------------------|-------|----------------------------------------------------------------------------------------------------------------------------------------------------------------------------|-----------------------------------------------------------------------------------------------------------------------------------------------------------------------------------------------------------------------------------|----------|
| Wagbatsoma <i>et al</i> [58]  | 2010 | Nigeria      | 385p               | ANC   | ITN utilization amongst those women attending ANC.                                                                                                                         | <i>Use:</i> Small family size                                                                                                                                                                                                     | Fisher's |
| Bennett <i>et al</i> [28]     | 2012 | Sierra Leone | 4620 HH<br>609p    | HH    | National survey 6 months post LLIN distribution campaign (universal coverage aim) + hang up campaign.                                                                      | <i>Use:</i> Older age 35-49 yo vs 15-24 yo OR 6.1 (1.9-19.3), having a hanging ITN, >1 ITN/ 2ppl in HH                                                                                                                            | MV       |
| Napoleon <i>et al</i> [65]    | 2011 | South Sudan  | 334p               | ANC   | Cross sectional survey at a tertiary hospital.                                                                                                                             | <i>Use:</i> Having bought an ITN OR 504.1 (91.5-2777.9), use of indoor spray OR 16.6 (1.3-206.2), higher HH income OR 0.17 (0.04-0.7)                                                                                             | MV       |
| Hassan <i>et al</i> [66]      | 2008 | Sudan        | 19p                | HH    | HH survey 1 year post distribution, looking at retention and use of ITNs.                                                                                                  | <i>Ownership:</i> Lower education, more nets<br><i>Retention:</i> Higher in those with formal education<br><i>Use:</i> higher in those who received ITN education                                                                 | Chi      |
| Ambrose <i>et al</i> [67]     | 2011 | Tanzania     | 222p               | ANC   | Knowledge Attitude Practice surveys regarding malaria/ bed net use amongst women attending ANC.                                                                            | <i>Ownership:</i> Multigravid OR 2.1 (1.2-4.8), married OR 1.9 (1.2-5.2)<br><i>Use:</i> Education, gravidity, fear of malaria                                                                                                     | BV       |
| Marchant <i>et al</i> [25]    | 2010 | Tanzania     | 2027<br>707p       | HH    | Assessment of voucher scheme amongst post partum women (n=1320) and currently pregnant women (n=720).                                                                      | <i>Use:</i> Socioeconomic status 7% ownership amongst poorest (CI 4-13), 48% amongst richest (CI 38-59)                                                                                                                           | Chi      |
| Sangare <i>et al</i> [70]     | 2012 | Uganda       | 500p               | HH    | HH surveys of women post partum and pregnant, to examine determinants of ownership and use.                                                                                | <i>Use:</i> Ownership of >1 ITN RR 1.13 (1-1.3), media advertising bigger influence on use than provision of free ITNs RR 1.5 (1.2-1.8), wealthiest quintile RR 0.77 (0.6- 1), acquisition in pregnancy associated with 100% use. | MV       |
| Ahmed <i>et al</i> [20]       | 2010 | Uganda       | 10234<br>HH        | HH    | Possession and use of ITNs in HH with pregnant women and children <5 yo. Assessing equity of an NGO program.                                                               | <i>Use:</i> Wealth, urban setting                                                                                                                                                                                                 | Chi      |
| Kolaczinski <i>et al</i> [31] | 2010 | Uganda       | 328p<br>520<br>547 | HH    | Comparing 3 ITN delivery channels to target groups: Routine ANC/ Global Fund for Aids Tuberculosis Malaria funded targeted HH campaign/ USAID funded targeted HH campaign. | <i>Use:</i> Public distribution source of ITN OR 8.4 (4-17.8), large family size >7 OR 1.4 (1.1-1.9)                                                                                                                              | MV       |

**Legend:** p Pregnant women, ANC Antenatal clinic, HH Household, Hosp. Hospital, IPT Intermittent Preventive Treatment, OR Odds Ratio, RR Risk Ratio, CIs 95% Confidence Interval, MV Multivariate, BV Bivariate, UV Univariate, Chi Chi squared analysis, Fisher's Fischer's exact test.
